# Supplementary material for: Oxidation of HOSO˙ by O2 (3Σg−): a key reaction deciding the fate of HOSO˙ in the atmosphere
Source: Royal Society of Chemistry journal article supplement (doi:10.1039/d2cp00001f), 2022-01-01
Supplement: d2cp00001f1.pdf [file d2cp00001f1.pdf]

**ESI of**  
**Oxidation of HOSO• by O<sub>2</sub> (<sup>3</sup>Σ<sub>g</sub><sup>-</sup>): A key reaction**  
**deciding the fate of HOSO• in the atmosphere**

Philips Kumar Rai, Saptarshi Sarkar, Biman Bandyopadhyay,\* and Pradeep  
Kumar\*

*Department of Chemistry, Malaviya National Institute of Technology Jaipur, Jaipur,  
302017, India*

E-mail: biman.chy@mnit.ac.in; pradeep.chy@mnit.ac.in

**Sl. No.****Contents**

1. **Table S1:** Comparison of frequencies (in  $\text{cm}^{-1}$ ) and geometrical parameters of the isolated species, obtained in present work (MN15L/aug-cc-pV(T+d)Z) and at other methods (MP2/aug-cc-pV(T+d)Z and M06-2X/aug-cc-pV(T+d)Z) with the experimental and higher level theoretical data available in literature.
2. **Table S2:** T1 diagnostic values for each species involved in the reaction.
3. **Figure S1:** Gibbs free energy profile for  $\text{HOSO}^\bullet + \text{O}_2$  ( $^3\Sigma_g^-$ ) reaction obtained at CCSD(T)/CBS level of theory at 298 K.
4. **Table S3:** Pressure dependence bimolecular rate constants  $k(T)$  in  $\text{cm}^3 \text{ molecule}^{-1} \text{ s}^{-1}$  for  $\text{HOSO}^\bullet + \text{O}_2$  ( $^3\Sigma_g^-$ ) reaction within temperature range of 213-400 K.
5. **Table S4:** Cartesian coordinates and all normal mode frequencies of the optimized geometries calculated at MN15L/aug-cc-pV(T+d)Z level of theory.
6. **Table S5:** Topological properties of the bond critical points of the three species; RC, TS1 and PC involved in the reaction.
7. **Figure S2:** IRC for the transition state (TS1) of the title reaction obtained at MN15L/aug-cc-pV(T+d)Z level of theory.
8. **Figure S3:** Potential energy surface for  $\text{HOSO}^\bullet + \text{O}_2$  ( $^1\Delta_g$ ) reaction after including post-CCSD(T) corrections.
9. **Table S6:** The bimolecular rate constants ( $k(T)$ ),  $k_{eff}$  and  $t_{1/2}$  for  $\text{HOSO}^\bullet + \text{O}_2$  ( $^1\Delta_g$ ).
10. **Table S7:** The rate constant values for  $\text{HOSO}^\bullet + \text{O}_2$  ( $^3\Sigma_g^-$ ) reaction with rigid rotor treatment ( $k_{WTHR}$ ) along with hindered rotor treatment ( $k_{HR}$ ).
11. **Table S8:** The rate constant values for  $\text{HOSO}^\bullet + \text{O}_2$  ( $^3\Sigma_g^-$ ) reaction through TS2 using TST/ZCT method.

Table S1: Comparison of frequencies (in  $\text{cm}^{-1}$ ) and geometrical parameters of the isolated species, obtained in present work (MN15L/aug-cc-pV(T+d)Z) and at other methods (MP2/aug-cc-pV(T+d)Z and M06-2X/aug-cc-pV(T+d)Z) with the experimental and higher level theoretical data available in literature.

| Methods                | Species              | Frequencies (in $\text{cm}^{-1}$ ) |        |        | Bond lengths (Å) |           |           |           |             | Angles ( $^\circ$ ) |             |             |             | $D_{O-S-O-H}$ |
|------------------------|----------------------|------------------------------------|--------|--------|------------------|-----------|-----------|-----------|-------------|---------------------|-------------|-------------|-------------|---------------|
|                        |                      |                                    |        |        | $R_{O-H}$        | $R_{O=O}$ | $R_{O-O}$ | $R_{S-O}$ | $R_{S=O}$   | $A_{O-O-H}$         | $A_{O=S=O}$ | $A_{O=S-O}$ | $A_{H-O-S}$ |               |
| Experimental           | $O_2 (^3\Sigma_g^-)$ | 1580                               |        |        | 1.21             |           |           |           |             |                     |             |             |             |               |
|                        | $SO_2$               | 526                                | 1168   | 1381   |                  |           |           |           |             | 119.5               |             |             |             |               |
|                        | $HO_2^*$             | 1098                               | 1392   | 3436   | 0.97             | 1.33      |           |           | 1.43        | 104.3               |             |             |             |               |
| ROCCSD(T)/cc-pV(5+d)Z  | planar syn-HOSO*     | 389                                | 784    | 1055   | 0.97             | 1.63      |           |           | 1.47        | 108.3 107.9         |             |             |             | 0.0           |
| ROCCSD(T)/cc-pV(5+d)Z  | planar anti-HOSO*    |                                    |        |        | 0.97             | 1.64      |           |           | 1.46        | 105.3 108.2         |             |             |             | 180.0         |
| ROCCSD(T)/cc-pV(T+d)Z  | non-planar syn-HOSO* |                                    |        |        | 0.97             | 1.64      |           |           | 1.47        | 108.8 107.2         |             |             |             | 24.2          |
| MN15L/aug-cc-pV(T+d)Z  | $O_2 (^3\Sigma_g^-)$ | 1681.6                             |        |        | 1.21             |           |           |           |             |                     |             |             |             |               |
|                        | $SO_2$               | 537                                | 1229   | 1436   |                  |           |           |           |             | 119.0               |             |             |             |               |
|                        | $HO_2^*$             | 1200                               | 1463   | 3645   | 0.97             | 1.32      |           |           | 1.43        | 105.2               |             |             |             |               |
|                        | planar syn-HOSO*     | 32i                                | 402.3  | 828.8  | 0.97             | 1.62      |           |           | 1.47        | 108.4 107.8         |             |             |             | 1.9           |
|                        | planar anti-HOSO*    | 118.8                              | 424.8  | 817.3  | 0.97             | 1.63      |           |           | 1.46        | 105.0 108.4         |             |             |             | 180.0         |
|                        | non-planar syn-HOSO* | 1097.1                             | 1261.7 | 3819.9 |                  |           |           |           |             |                     |             |             |             |               |
|                        | non-planar syn-HOSO* | 56.1                               | 406.6  | 828.5  | 0.97             | 1.62      |           |           | 1.47        | 108.6 108.0         |             |             |             | 12.7          |
| M06-2X/aug-cc-pV(T+d)Z | $O_2 (^3\Sigma_g^-)$ | 1754.5                             |        |        | 1.19             |           |           |           |             |                     |             |             |             |               |
|                        | $SO_2$               | 540                                | 1253   | 1453   |                  |           |           |           |             | 118.9               |             |             |             |               |
|                        | $HO_2^*$             | 1253                               | 1459.5 | 3688.8 | 0.97             | 1.31      |           |           | 1.43        | 105.8               |             |             |             |               |
|                        | planar syn-HOSO*     | 41.8                               | 403.8  | 830.1  | 0.97             | 1.62      |           |           | 1.46        | 108.0 109.0         |             |             |             | 1.74          |
|                        | planar anti-HOSO*    | 1081.5                             | 1229.7 | 3787.3 |                  |           |           |           |             |                     |             |             |             |               |
|                        | planar anti-HOSO*    | 65.9i                              | 426.1  | 816.1  | 0.97             | 1.63      |           |           | 1.45        | 105.2 109.7         |             |             |             | 180.0         |
|                        | non-planar syn-HOSO* | 1071.3                             | 1253.9 | 3822.8 |                  |           |           |           |             |                     |             |             |             |               |
| non-planar syn-HOSO*   | 41.8                 | 403.8                              | 830.4  | 0.97   | 1.62             |           |           | 1.46      | 108.0 109.0 |                     |             |             | 0.0         |               |
| MP2/aug-cc-pV(T+d)Z    | $O_2 (^3\Sigma_g^-)$ | 1454                               |        |        | 1.22             |           |           |           |             |                     |             |             |             |               |
|                        | $SO_2$               | 498                                | 1119   | 1338.4 |                  |           |           |           |             | 119.7               |             |             |             |               |
|                        | $HO_2^*$             | 1223                               | 1449   | 3659   | 0.97             | 1.31      |           |           | 1.45        | 104.7               |             |             |             |               |
|                        | planar syn-HOSO*     | 150.6                              | 383.9  | 802.0  | 0.97             | 1.63      |           |           | 1.47        | 108.9 107.0         |             |             |             | 1.0           |
|                        | planar anti-HOSO*    | 1068.4                             | 1267.2 | 3716.6 |                  |           |           |           |             |                     |             |             |             |               |
|                        | planar anti-HOSO*    | 144.1                              | 411.9  | 786    | 0.97             | 1.64      |           |           | 1.46        | 106.0 108.1         |             |             |             | 180.0         |
|                        | non-planar syn-HOSO* | 1062                               | 1338.8 | 3751.6 |                  |           |           |           |             |                     |             |             |             |               |
| non-planar syn-HOSO*   | 147.2                | 383.6                              | 802    | 0.97   | 1.63             |           |           | 1.47      | 108.9 107.0 |                     |             |             | 0.0         |               |
| non-planar syn-HOSO*   | 1068                 | 1268                               | 3717.3 |        |                  |           |           |           |             |                     |             |             |             |               |

Table S2: T1 diagnostic values for each species involved in the reaction.

| Species                                                     | T1 diagnostic |
|-------------------------------------------------------------|---------------|
| HOSO•                                                       | 0.0209        |
| O <sub>2</sub> ( <sup>3</sup> Σ <sub>g</sub> <sup>-</sup> ) | 0.0176        |
| RC                                                          | 0.0335        |
| TS                                                          | 0.0273        |
| PC                                                          | 0.0271        |
| SO <sub>2</sub>                                             | 0.0209        |
| HO <sub>2</sub> •                                           | 0.0299        |

Figure S1: Gibbs free energy profile for  $\text{HOSO}^\bullet + \text{O}_2$  ( $^3\Sigma_g^-$ ) reaction obtained at CCSD(T)/CBS level of theory at 298 K.

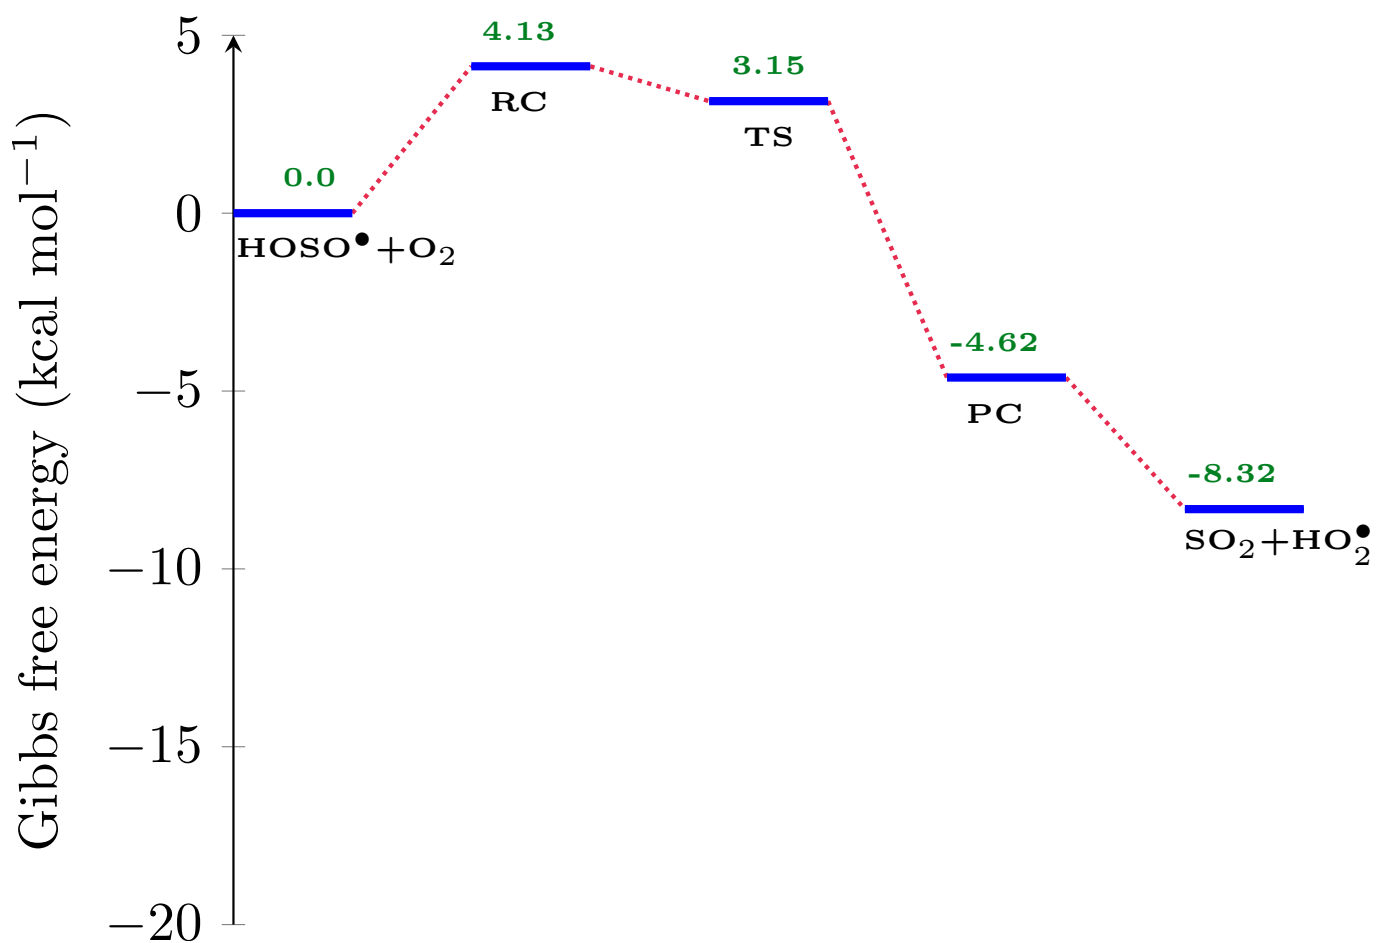

Table S3: Pressure dependence bimolecular rate constants  $k(T)$  in  $\text{cm}^3 \text{ molecule}^{-1} \text{ s}^{-1}$  for  $\text{HOSO}\bullet + \text{O}_2$  ( ${}^3\Sigma_g^-$ ) reaction within temperature range of 213-400 K obtained at CCSD(T)/CBS level of theory.

| Temp (K) | Pressure (atm)         |                        |                        |                        |                        |
|----------|------------------------|------------------------|------------------------|------------------------|------------------------|
|          | 0.1                    | 0.5                    | 1.0                    | 5.0                    | 10.0                   |
| 213      | $2.94 \times 10^{-13}$ |
| 216      | $2.87 \times 10^{-13}$ | $2.87 \times 10^{-13}$ | $2.87 \times 10^{-13}$ | $2.87 \times 10^{-13}$ | $2.86 \times 10^{-13}$ |
| 219      | $2.80 \times 10^{-13}$ | $2.80 \times 10^{-13}$ | $2.80 \times 10^{-13}$ | $2.79 \times 10^{-13}$ | $2.79 \times 10^{-13}$ |
| 224      | $2.68 \times 10^{-13}$ |
| 235      | $2.46 \times 10^{-13}$ | $2.46 \times 10^{-13}$ | $2.46 \times 10^{-13}$ | $2.45 \times 10^{-13}$ | $2.45 \times 10^{-13}$ |
| 250      | $2.20 \times 10^{-13}$ | $2.20 \times 10^{-13}$ | $2.20 \times 10^{-13}$ | $2.20 \times 10^{-13}$ | $2.19 \times 10^{-13}$ |
| 259      | $2.06 \times 10^{-13}$ | $2.06 \times 10^{-13}$ | $2.06 \times 10^{-13}$ | $2.05 \times 10^{-13}$ | $2.05 \times 10^{-13}$ |
| 260      | $2.05 \times 10^{-13}$ | $2.05 \times 10^{-13}$ | $2.05 \times 10^{-13}$ | $2.04 \times 10^{-13}$ | $2.03 \times 10^{-13}$ |
| 265      | $1.98 \times 10^{-13}$ | $1.98 \times 10^{-13}$ | $1.97 \times 10^{-13}$ | $1.97 \times 10^{-13}$ | $1.96 \times 10^{-13}$ |
| 270      | $1.91 \times 10^{-13}$ | $1.91 \times 10^{-13}$ | $1.91 \times 10^{-13}$ | $1.90 \times 10^{-13}$ | $1.89 \times 10^{-13}$ |
| 278      | $1.81 \times 10^{-13}$ | $1.81 \times 10^{-13}$ | $1.81 \times 10^{-13}$ | $1.80 \times 10^{-13}$ | $1.79 \times 10^{-13}$ |
| 280      | $1.79 \times 10^{-13}$ | $1.79 \times 10^{-13}$ | $1.79 \times 10^{-13}$ | $1.78 \times 10^{-13}$ | $1.77 \times 10^{-13}$ |
| 290      | $1.68 \times 10^{-13}$ | $1.68 \times 10^{-13}$ | $1.68 \times 10^{-13}$ | $1.67 \times 10^{-13}$ | $1.66 \times 10^{-13}$ |
| 298      | $1.59 \times 10^{-13}$ | $1.59 \times 10^{-13}$ | $1.59 \times 10^{-13}$ | $1.58 \times 10^{-13}$ | $1.57 \times 10^{-13}$ |
| 300      | $1.57 \times 10^{-13}$ | $1.57 \times 10^{-13}$ | $1.56 \times 10^{-13}$ | $1.55 \times 10^{-13}$ | $1.55 \times 10^{-13}$ |
| 310      | $1.48 \times 10^{-13}$ | $1.48 \times 10^{-13}$ | $1.48 \times 10^{-13}$ | $1.47 \times 10^{-13}$ | $1.45 \times 10^{-13}$ |
| 320      | $1.40 \times 10^{-13}$ | $1.40 \times 10^{-13}$ | $1.40 \times 10^{-13}$ | $1.38 \times 10^{-13}$ | $1.37 \times 10^{-13}$ |
| 350      | $1.19 \times 10^{-13}$ | $1.19 \times 10^{-13}$ | $1.19 \times 10^{-13}$ | $1.17 \times 10^{-13}$ | $1.15 \times 10^{-13}$ |
| 400      | $9.41 \times 10^{-14}$ | $9.33 \times 10^{-14}$ | $9.25 \times 10^{-14}$ | $9.01 \times 10^{-14}$ | $8.88 \times 10^{-14}$ |

Table S4: Cartesian coordinates and all normal mode frequencies of the optimized geometries calculated at MN15L/aug-cc-pV(T+d)Z level of theory.

| Compound       | Cartesian coordinate (Å) |           |           | Frequencies (cm <sup>-1</sup> ) |          |         |
|----------------|--------------------------|-----------|-----------|---------------------------------|----------|---------|
| HOSO•          | S                        | -0.134547 | -0.478520 | 0.009617                        |          |         |
|                | O                        | -1.184717 | 0.545269  | -0.012196                       | 56.14    | 406.64  |
|                | O                        | 1.308033  | 0.260965  | -0.025750                       | 1100.41  | 1239.26 |
|                | H                        | 1.166214  | 1.206443  | 0.149688                        | 3790.26  |         |
| O <sub>2</sub> | O                        | 0.000000  | 0.000000  | 0.603041                        | 1681.63  |         |
|                | O                        | 0.000000  | 0.000000  | -0.603041                       |          |         |
| RC             | S                        | -0.740183 | 0.008989  | -0.405436                       |          |         |
|                | O                        | -1.397849 | -0.726807 | 0.638984                        | 101.31   | 212.17  |
|                | O                        | -0.167537 | 1.360034  | 0.107436                        | 367.08   | 465.33  |
|                | H                        | 0.749462  | 1.177905  | 0.493786                        | 645.80   | 949.21  |
|                | O                        | 1.087982  | -0.777235 | -0.334570                       | 1307.96  | 1344.47 |
|                | O                        | 1.864087  | -0.021209 | 0.337299                        | 3056.80  |         |
| TS1            | S                        | -0.794665 | 0.050472  | -0.402293                       |          |         |
|                | O                        | -1.493501 | -0.687864 | 0.613350                        | -762.07  | 143.64  |
|                | O                        | -0.090744 | 1.286145  | 0.123334                        | 343.28   | 486.55  |
|                | H                        | 0.959482  | 0.946527  | 0.377946                        | 795.15   | 1006.82 |
|                | O                        | 1.180466  | -0.848087 | -0.294249                       | 1331.31  | 1378.65 |
|                | O                        | 1.873173  | 0.030546  | 0.314907                        | 1815.78  |         |
| TS2            | S                        | 1.471872  | -0.318657 | -0.133595                       |          |         |
|                | O                        | 1.765468  | 1.074137  | 0.136478                        | -1370.59 | 26.89   |
|                | O                        | 0.099313  | -0.760150 | 0.350413                        | 98.30    | 230.47  |
|                | H                        | -0.825447 | -0.338063 | -0.098757                       | 672.86   | 990.74  |
|                | O                        | -2.753060 | 0.254722  | 0.371496                        | 1293.37  | 1422.18 |
|                | O                        | -1.952284 | 0.110863  | -0.578851                       | 1510.42  |         |

|                              |   |           |           |           |         |         |         |
|------------------------------|---|-----------|-----------|-----------|---------|---------|---------|
| PC                           | S | -0.967766 | 0.055251  | -0.374850 |         |         |         |
|                              | O | -1.555000 | -0.833277 | 0.584310  | 69.00   | 111.80  | 152.93  |
|                              | O | -0.350206 | 1.265083  | 0.130575  | 251.30  | 303.60  | 532.38  |
|                              | O | 1.534336  | -0.814497 | -0.325915 | 549.02  | 1195.09 | 1260.94 |
|                              | O | 2.128732  | 0.165500  | 0.305543  | 1398.20 | 1532.20 | 3354.59 |
|                              | H | 1.421359  | 0.853500  | 0.441494  |         |         |         |
| SO <sub>2</sub>              | S | 0.000000  | 0.000000  | 0.363728  |         |         |         |
|                              | O | 0.000000  | 1.235372  | -0.363728 | 537.12  | 1229.08 | 1436.92 |
|                              | O | 0.000000  | -1.235372 | -0.363728 |         |         |         |
| HO <sub>2</sub> <sup>•</sup> | O | 0.055586  | 0.716132  | 0.000000  |         |         |         |
|                              | O | 0.055586  | -0.607996 | 0.000000  | 1200.65 | 1463.72 | 3645.26 |
|                              | H | -0.889383 | -0.865087 | 0.000000  |         |         |         |



Table S5: Topological properties of the bond critical points of the three species; RC, TS1 and PC involved in the reaction. The properties are determined from Bader topological analysis of the effective MN15L/aug-cc-pVTZ wave function and atom numbering refers to figure S4. [a] represents the density of all electrons (e bohr<sup>-3</sup>), [b]; Laplacian of electron density (e bohr<sup>-5</sup>), [c]; energy density (hartree bohr<sup>-3</sup>), [d]; ellipticity of electron density and [e] represents the spin density of electrons.

| Species | Bond  | $\rho(r)^a$ | $\nabla^2\rho(r)^b$ | $E(r)^c$ | $\epsilon^d$ | $\rho(s)^e$ |
|---------|-------|-------------|---------------------|----------|--------------|-------------|
| RC      | S1-O2 | 0.2995      | 1.2753              | -0.3426  | 0.0985       | 0.0005      |
|         | S1-O5 | 0.1188      | 0.0029              | -0.0587  | 0.0762       | -0.0040     |
|         | O5-O6 | 0.4469      | -0.2571             | -0.4491  | 0.0125       | -0.0027     |
|         | S1-O3 | 0.2400      | 0.5146              | -0.2690  | 0.0231       | -0.0001     |
|         | O6-H4 | 0.0583      | 0.1293              | -0.0131  | 0.0598       | -0.0017     |
|         | O3-H4 | 0.3051      | -2.1540             | -0.6109  | 0.0073       | -0.0010     |
| TS1     | S1-O2 | 0.2985      | 1.2929              | -0.3392  | 0.1274       | 0.0005      |
|         | S1-O5 | 0.0797      | 0.0929              | -0.0215  | 0.0608       | -0.0035     |
|         | O5-O6 | 0.4495      | -0.2762             | -0.4535  | 0.0256       | -0.0030     |
|         | S1-O3 | 0.2569      | 0.7357              | -0.2884  | 0.0662       | -0.0001     |
|         | O6-H4 | 0.1448      | -0.1458             | -0.1169  | 0.0060       | -0.0028     |
|         | O3-H4 | 0.2154      | -0.8527             | -0.3029  | 0.0039       | -0.0019     |
| PC      | S1-O2 | 0.2995      | 1.3503              | -0.3371  | 0.1496       | 0.0001      |
|         | S1-O4 | 0.0263      | 0.0785              | 0.0017   | 0.0822       | -0.0015     |
|         | O4-O5 | 0.4093      | -0.1635             | -0.3740  | 0.0333       | -0.0023     |
|         | S1-O3 | 0.2901      | 1.2085              | -0.3259  | 0.1337       | 0.0000      |
|         | O5-H6 | 0.3362      | -2.4753             | -0.6815  | 0.0256       | -0.0047     |
|         | O3-H6 | 0.0309      | 0.1066              | 0.0005   | 0.0355       | -0.0007     |

Figure S2: IRC for the transition state (TS1) of the title reaction obtained at MN15L/aug-cc-pV(T+d)Z level of theory.

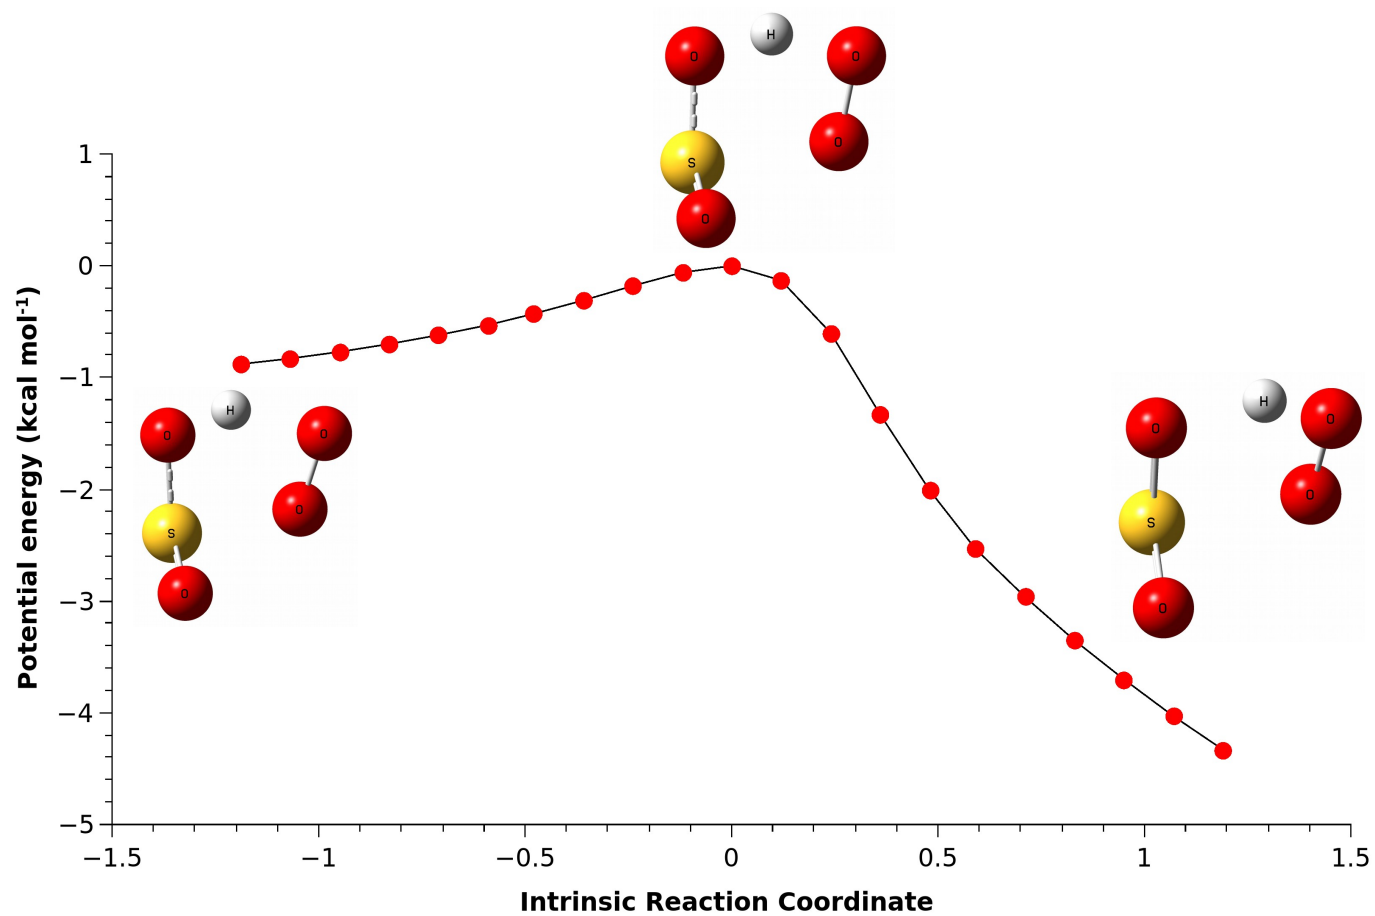

Figure S3: Potential energy surface for  $\text{HOSO}\cdot + {}^1\text{O}_2$  ( ${}^1\Delta_g$ ) reaction after including post-CCSD(T) corrections.

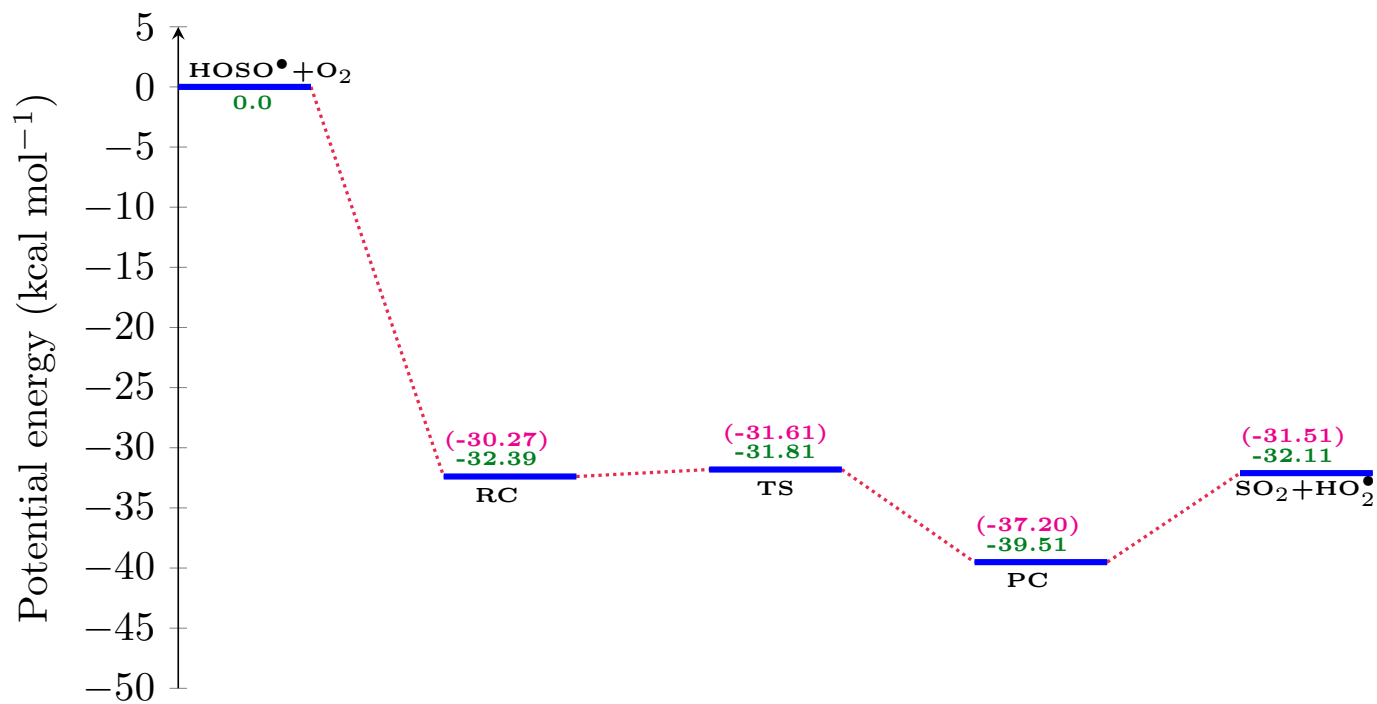

Table S6: The bimolecular rate constants ( $k(T)$ ), effective rate constants ( $k_{eff}$ ) and atmospheric lifetime ( $t_{1/2}$ ) for  $\text{HOSO}\cdot + \text{O}_2$  ( $^1\Delta_g$ ). The values given for  $k(T)$  and  $k_{eff}$  are in  $\text{cm}^3 \text{molecule}^{-1} \text{s}^{-1}$  and  $t_{1/2}$  is given in seconds.

| T(K) | $k(T)$                 | $k_{eff}$             | $t_{1/2}$             |
|------|------------------------|-----------------------|-----------------------|
| 213  | $1.36 \times 10^{-12}$ | $6.80 \times 10^{-1}$ | $1.02 \times 10^0$    |
| 216  | $1.37 \times 10^{-12}$ | $6.84 \times 10^{-1}$ | $1.01 \times 10^0$    |
| 219  | $1.38 \times 10^{-12}$ | $6.89 \times 10^{-1}$ | $1.01 \times 10^0$    |
| 224  | $1.40 \times 10^{-12}$ | $6.98 \times 10^{-1}$ | $9.93 \times 10^{-1}$ |
| 235  | $1.44 \times 10^{-12}$ | $7.21 \times 10^{-1}$ | $9.61 \times 10^{-1}$ |
| 250  | $1.51 \times 10^{-12}$ | $7.54 \times 10^{-1}$ | $9.20 \times 10^{-1}$ |
| 259  | $1.54 \times 10^{-12}$ | $7.72 \times 10^{-1}$ | $8.98 \times 10^{-1}$ |
| 260  | $1.55 \times 10^{-12}$ | $7.77 \times 10^{-1}$ | $8.92 \times 10^{-1}$ |
| 265  | $1.57 \times 10^{-12}$ | $7.86 \times 10^{-1}$ | $8.82 \times 10^{-1}$ |
| 270  | $1.60 \times 10^{-12}$ | $8.00 \times 10^{-1}$ | $8.67 \times 10^{-1}$ |
| 278  | $1.64 \times 10^{-12}$ | $8.18 \times 10^{-1}$ | $8.47 \times 10^{-1}$ |
| 280  | $1.64 \times 10^{-12}$ | $8.22 \times 10^{-1}$ | $8.43 \times 10^{-1}$ |
| 290  | $1.70 \times 10^{-12}$ | $8.48 \times 10^{-1}$ | $8.17 \times 10^{-1}$ |
| 298  | $1.74 \times 10^{-12}$ | $8.68 \times 10^{-1}$ | $7.99 \times 10^{-1}$ |
| 300  | $1.74 \times 10^{-12}$ | $8.72 \times 10^{-1}$ | $7.95 \times 10^{-1}$ |
| 310  | $1.80 \times 10^{-12}$ | $8.99 \times 10^{-1}$ | $7.71 \times 10^{-1}$ |
| 320  | $1.85 \times 10^{-12}$ | $9.25 \times 10^{-1}$ | $7.49 \times 10^{-1}$ |
| 350  | $2.01 \times 10^{-12}$ | $1.01 \times 10^0$    | $6.88 \times 10^{-1}$ |
| 400  | $2.29 \times 10^{-12}$ | $1.14 \times 10^0$    | $6.06 \times 10^{-1}$ |

Table S7: The rate constant values for  $\text{HOSO}^\bullet + \text{O}_2$  ( ${}^3\Sigma_g^-$ ) reaction with rigid rotor harmonic approximation ( $k_{WTHR}$ ) along with hindered rotor approximation ( $k_{HR}$ ). The values are given in  $\text{cm}^3 \text{ molecule}^{-1} \text{ s}^{-1}$ .

| T(K) | $k_{WTHR}$             | $k_{HR}$               |
|------|------------------------|------------------------|
| 213  | $3.17 \times 10^{-13}$ | $3.17 \times 10^{-13}$ |
| 216  | $3.09 \times 10^{-13}$ | $3.09 \times 10^{-13}$ |
| 219  | $3.02 \times 10^{-13}$ | $3.01 \times 10^{-13}$ |
| 224  | $2.90 \times 10^{-13}$ | $2.90 \times 10^{-13}$ |
| 235  | $2.67 \times 10^{-13}$ | $2.66 \times 10^{-13}$ |
| 250  | $2.39 \times 10^{-13}$ | $2.38 \times 10^{-13}$ |
| 259  | $2.25 \times 10^{-13}$ | $2.23 \times 10^{-13}$ |
| 260  | $2.23 \times 10^{-13}$ | $2.21 \times 10^{-13}$ |
| 265  | $2.15 \times 10^{-13}$ | $2.14 \times 10^{-13}$ |
| 270  | $2.08 \times 10^{-13}$ | $2.07 \times 10^{-13}$ |
| 278  | $1.97 \times 10^{-13}$ | $1.97 \times 10^{-13}$ |
| 280  | $1.95 \times 10^{-13}$ | $1.94 \times 10^{-13}$ |
| 290  | $1.83 \times 10^{-13}$ | $1.82 \times 10^{-13}$ |
| 298  | $1.75 \times 10^{-13}$ | $1.74 \times 10^{-13}$ |
| 300  | $1.73 \times 10^{-13}$ | $1.72 \times 10^{-13}$ |
| 310  | $1.62 \times 10^{-13}$ | $1.61 \times 10^{-13}$ |
| 320  | $1.54 \times 10^{-13}$ | $1.53 \times 10^{-13}$ |
| 350  | $1.32 \times 10^{-13}$ | $1.30 \times 10^{-13}$ |
| 400  | $1.04 \times 10^{-13}$ | $1.03 \times 10^{-13}$ |

Table S8: The rate constant values for  $\text{HOSO}^\bullet + \text{O}_2$  ( ${}^3\Sigma_g^-$ ) reaction through TS2 using TST/ZCT method. The values are given in  $\text{cm}^3 \text{ molecule}^{-1} \text{ s}^{-1}$ .

| T(K) | $k_{TST}$              | ZCT                | $k_{TST/ZCT}$          |
|------|------------------------|--------------------|------------------------|
| 213  | $4.10 \times 10^{-32}$ | $9.35 \times 10^2$ | $3.83 \times 10^{-29}$ |
| 216  | $7.29 \times 10^{-32}$ | $6.84 \times 10^2$ | $4.98 \times 10^{-29}$ |
| 219  | $1.28 \times 10^{-31}$ | $5.08 \times 10^2$ | $6.49 \times 10^{-29}$ |
| 224  | $3.14 \times 10^{-31}$ | $3.21 \times 10^2$ | $1.01 \times 10^{-28}$ |
| 235  | $2.00 \times 10^{-30}$ | $1.35 \times 10^2$ | $2.70 \times 10^{-28}$ |
| 250  | $1.92 \times 10^{-29}$ | $5.35 \times 10^1$ | $1.03 \times 10^{-27}$ |
| 259  | $6.61 \times 10^{-29}$ | $3.45 \times 10^1$ | $2.28 \times 10^{-27}$ |
| 260  | $7.55 \times 10^{-29}$ | $3.30 \times 10^1$ | $2.49 \times 10^{-27}$ |
| 265  | $1.44 \times 10^{-28}$ | $2.67 \times 10^1$ | $3.85 \times 10^{-27}$ |
| 270  | $2.68 \times 10^{-28}$ | $2.21 \times 10^1$ | $5.92 \times 10^{-27}$ |
| 278  | $6.94 \times 10^{-28}$ | $1.68 \times 10^1$ | $1.17 \times 10^{-26}$ |
| 280  | $8.73 \times 10^{-28}$ | $1.58 \times 10^1$ | $1.38 \times 10^{-26}$ |
| 290  | $2.62 \times 10^{-27}$ | $1.19 \times 10^1$ | $3.13 \times 10^{-26}$ |
| 298  | $6.00 \times 10^{-27}$ | $9.85 \times 10^0$ | $5.91 \times 10^{-26}$ |
| 300  | $7.34 \times 10^{-27}$ | $9.42 \times 10^0$ | $6.91 \times 10^{-26}$ |
| 310  | $1.92 \times 10^{-26}$ | $7.70 \times 10^0$ | $1.48 \times 10^{-25}$ |
| 320  | $4.76 \times 10^{-26}$ | $6.47 \times 10^0$ | $3.08 \times 10^{-25}$ |
| 350  | $5.33 \times 10^{-25}$ | $4.34 \times 10^0$ | $2.31 \times 10^{-24}$ |
| 400  | $1.37 \times 10^{-23}$ | $2.86 \times 10^0$ | $3.92 \times 10^{-23}$ |

Table S9: The relative energy and ZPE value of TS1 (in  $\text{kcal mol}^{-1}$ ) with respect to RC at different level of theories. [a]; after including post-CCSD(T) corrections (table 1 in the manuscript), [b]; ZPE values obtained at MN15L/aug-cc-pV(T+d)Z level of theory.

| Species | CCSD(T)/CBS | Post-CCSD(T) <sup>a</sup> | MRCI+Q/6-311G** | ZPE <sup>b</sup> |
|---------|-------------|---------------------------|-----------------|------------------|
| TS1     | 0.64        | 0.57                      | 0.63            | -1.91            |
